# Modestly Elevated Glucose Levels During Pregnancy Are Associated With a Higher Risk of Future Diabetes Among Women Without Gestational Diabetes Mellitus

DARCY B. CARR, MD, MS<sup>1</sup>  
 KATHERINE M. NEWTON, PHD<sup>2,3</sup>  
 KRISTINA M. UTZSCHNEIDER, MD<sup>4</sup>  
 JENNY TONG, MD, MPH<sup>4</sup>

FERNANDO GERCHMAN, MD<sup>4</sup>  
 STEVEN E. KAHN, MB, CHB<sup>4</sup>  
 SUSAN R. HECKBERT, MD, PHD<sup>2,3,5</sup>

**OBJECTIVE** — To determine whether 1-h oral glucose challenge test (OGCT) or 3-h oral glucose tolerance test (OGTT) results below gestational diabetes mellitus (GDM) criteria are associated with developing diabetes.

**RESEARCH DESIGN AND METHODS** — A retrospective cohort study was performed among women without GDM who had a pregnancy OGCT ( $n = 24,780$ ) or OGTT ( $n = 6,222$ ). Subsequent diabetes was ascertained by ICD-9 codes or pharmacy or laboratory data over a median follow-up of 8.8 years.

**RESULTS** — Diabetes risk increased across OGCT quartiles: adjusted hazard ratio (HR) 1.67 (95% CI 1.07–2.61) for 5.4–6.2 mmol/l, 2.13 (1.39–3.25) for 6.3–7.3 mmol/l, and 3.60 (2.41–5.39) for  $\geq 7.4$  mmol/l compared with  $\leq 5.3$  mmol/l. Women with one abnormal OGTT result had a higher risk compared with those with normal values (HR 2.08 [95% CI 1.35–3.20]).

**CONCLUSIONS** — Women with modestly elevated glucose levels below the threshold for GDM had a higher risk for diabetes.

*Diabetes Care* 31:1037–1039, 2008

**G**estational diabetes mellitus (GDM) is glucose intolerance first recognized during pregnancy (1) and is associated with an increased risk of developing type 2 diabetes (2–4). We hypothesized that mild glucose elevations during the two-step approach for GDM testing—the 50-g 1-h oral glucose challenge test (OGCT) followed by the diagnostic 100-g 3-h oral glucose tolerance test (OGTT) for an elevated OGCT (1)—would be associated with increased risk for subsequent diabetes. We therefore determined whether women with OGCT quartiles

2–4 have a higher risk of diabetes relative to quartile 1 and whether those with one abnormal OGTT value have a greater risk relative to those with normal values.

**RESEARCH DESIGN AND METHODS** — We performed a retrospective cohort study in the Group Health integrated health plan in Washington state. We studied the first pregnancy delivered during 1985–2002 in women without preexisting diabetes or GDM who received care  $\geq 1$  year before delivery and  $\geq 6$  weeks postpartum. The Group Health

institutional review board approved the study.

Quartiles of pregnancy OGCT results were created (Table 1). The OGTT was classified as normal, one abnormal value, or two or more abnormal values, the latter consistent with diagnosis of GDM by Carpenter/Coustan criteria: fasting glucose  $\geq 5.3$ , 1-h glucose  $\geq 10.0$ , 2-h glucose  $\geq 8.6$ , and 3-h glucose  $\geq 7.8$  mmol/l (1). We excluded women who had GDM determined by an OGTT (1) or ICD-9 code 648.8. Preterm delivery ( $< 37$  weeks gestation) was determined by ICD-9 code 644.2. Type 2 diabetes after pregnancy was determined through 31 August 2005 as previously described (5): ICD-9 codes 250.x0 and 250.x2 without complications and 250.2–250.9 with complications, fasting glucose  $\geq 7.0$  mmol/l or random glucose  $\geq 11.1$  mmol/l on two occasions (1), or a prescription for medication to treat diabetes. The earliest date of meeting one criterion was the event date. Incidence rates were calculated using the dates of discharge from the delivery and the subsequent periods of enrollment. Cox's proportional hazards models were used to estimate hazard ratios (HRs). Statistical significance was considered for  $P < 0.05$ .

**RESULTS** — Among the 24,780 women who had an OGCT (mean  $\pm$  SD age at delivery  $30.1 \pm 6.2$  years), 24.9% were primigravidas and 16.8% delivered preterm. Higher quartiles were associated with greater age and multiparity ( $P < 0.001$  for both). During a median follow-up of 8.8 years, the risk of diabetes was higher for quartiles 2–4 compared with that for quartile 1 (Table 1).

Among the 6,222 women who completed an OGTT (age  $32.2 \pm 5.7$  years), 19.3% were primigravidas and 17.5% delivered preterm. Abnormal values were associated with greater age ( $P < 0.001$ ). During a median follow-up of 9.7 years, diabetes was more likely in women with one abnormal result (Table 1).

From the <sup>1</sup>Department of Obstetrics & Gynecology, University of Washington, Seattle, Washington; the <sup>2</sup>Group Health Center for Health Studies, Seattle, Washington; the <sup>3</sup>Department of Epidemiology, University of Washington, Seattle, Washington; the <sup>4</sup>Division of Metabolism, Endocrinology, and Nutrition, Veterans Affairs Puget Sound Health Care System and the University of Washington, Seattle, Washington; and the <sup>5</sup>Cardiovascular Health Research Unit, Seattle, Washington.

Address correspondence and reprint requests to Darcy B. Carr, MD, MS, Obstetrics & Gynecology, Box 356460, University of Washington, Seattle, WA 98195-6460. E-mail: darcarr@u.washington.edu.

Received for publication 9 October 2007 and accepted in revised form 22 January 2008.

Published ahead of print at <http://care.diabetesjournals.org> on 25 January 2008. DOI: 10.2337/dc07-1957.

**Abbreviations:** GDM, gestational diabetes mellitus; OGCT, oral glucose challenge test; OGTT, oral glucose tolerance test.

© 2008 by the American Diabetes Association.

The costs of publication of this article were defrayed in part by the payment of page charges. This article must therefore be hereby marked "advertisement" in accordance with 18 U.S.C. Section 1734 solely to indicate this fact.

Table 1—Risk of developing subsequent diabetes by OGCT or OGTT values

|                                | Diabetes events | Incidence rate 100,000 person-years | Model 1*         | Model 2†         |
|--------------------------------|-----------------|-------------------------------------|------------------|------------------|
| OGCT quartiles (mmol/l)        |                 |                                     |                  |                  |
| <5.4 (ref.)                    | 30/6,768        | 0.96                                | 1.0              | 1.0              |
| 5.4–6.2                        | 50/6,304        | 1.64                                | 1.68 (1.07–2.66) | 1.72 (1.09–2.70) |
| 6.3–7.3                        | 65/6,245        | 2.05                                | 2.05 (1.33–3.16) | 2.13 (1.38–3.29) |
| >7.3                           | 99/5,463        | 3.41                                | 3.40 (2.25–5.11) | 3.65 (2.42–5.52) |
| OGTT number of abnormal values |                 |                                     |                  |                  |
| 0 (ref.)                       | 51/3,639        | 2.53                                | 1.0              | 1.0              |
| 1                              | 35/1,253        | 5.18                                | 2.06 (1.34–3.17) | 2.07 (1.34–3.18) |

Data are HR (95% CI) or *n* unless otherwise indicated. \*Unadjusted. †Adjusted for age, primigravidity, and preterm delivery.

**CONCLUSIONS**— In this large cohort study, women with OGCT results between 5.4 and 7.3 mmol/l had a 1.7- to 2-fold higher risk of developing diabetes compared with women with the lowest glucose values. Among women with an OGTT, those with one abnormal value had a twofold greater risk of subsequent diabetes compared with women with no abnormal values. The higher risk of diabetes in women who fell below the criteria for GDM was not attenuated by adjustment for age, primigravidity, or preterm delivery. Our finding is consistent with a study that reported higher frequencies of subsequent glucose intolerance in women with one abnormal OGTT value (6); however, that study was limited by the small sample size and its lack of longitudinal assessment.

Women with mildly elevated OGCT and OGTT results are more likely to have preeclampsia (7), fetal macrosomia (8,9), shoulder dystocia (8), cesarean delivery (9), and preterm birth (9). Similarly, women with one abnormal OGTT value have a greater risk of macrosomia, preeclampsia, and cesarean delivery (10). Thus, women who have intermediate values on their OGCT and OGTT have a higher risk of complications commonly associated with GDM compared with women with the lowest values.

The risk of diabetes in women with mildly elevated OGCT or OGTT results likely occurs because they have an intermediate form of glucose intolerance. Glucose metabolism is determined by insulin sensitivity and  $\beta$ -cell function, with a continuum between normal glucose tolerance, impaired glucose tolerance, and diabetes (11). Women with GDM are insulin resistant and have impaired  $\beta$ -cell function. Women with one abnormal OGTT value similarly have less  $\beta$ -cell compensation for their insulin resistance compared with women with normal OGTTs (12,13).

Our study's major strengths include the evaluation of a large, contemporary cohort of women screened for GDM using the two-step approach (1) with a median longitudinal follow-up of 9 years. One limitation is that subsequent diabetes was not systematically assessed, which may introduce bias in those selected for testing. Furthermore, we could not evaluate whether the OGCT and OGTT results were associated with a higher risk of diabetes above and beyond known risk factors because our database did not include race/ethnicity, family history, or BMI. In summary, women without GDM who had mildly elevated glucose results on their GDM screening tests had a greater risk of diabetes. Whether women who fall within this intermediate range of glucose intolerance during pregnancy may benefit from increased diabetes surveillance and lifestyle interventions proven to reduce the risk of developing diabetes (14,15) is unknown.

**Acknowledgments**— This work was supported by the Washington State Obstetrical Association, National Institutes of Health Grants K23RR16066 and K30RR022293 from the National Center for Research Resources, and the Department of Veterans Affairs.

We thank Walter Clinton for his expertise in the acquisition of the automated data.

#### References

- American Diabetes Association: Diagnosis and classification of diabetes mellitus (Position Statement). *Diabetes Care* 29:S43–S48, 2006
- Cheung NW, Byth K: Population health significance of gestational diabetes. *Diabetes Care* 26:2005–2009, 2003
- Kim C, Newton KM, Knopp RH: Gestational diabetes and the incidence of type 2 diabetes. *Diabetes Care* 25:1862–1868, 2002
- Kjos SL, Buchanan TA, Greenspoon JS, Montoro M, Bernstein GS, Mestman JH:

Gestational diabetes mellitus: the prevalence of glucose intolerance and diabetes mellitus in the first two months postpartum. *Obstet Gynecol* 163:93–98, 1990

- Newton KM, La Croix AZ, Heckbert SR, Abraham L, McCulloch D, Barlow W: Estrogen therapy and risk of cardiovascular events among women with type 2 diabetes. *Diabetes Care* 26:2810–2816, 2003
- Corrado F, D'Anna R, Cannata M, Cannizzaro D, Caputo F, Raffone E, Di Benedetto A: Positive association between a single abnormal glucose tolerance test value in pregnancy and subsequent abnormal glucose tolerance. *Am J Obstet Gynecol* 196:e1–e5, 2007
- Joffe GM, Esterlitz JR, Levine RJ, Clemens JD, Ewell MG, Sibai BM, Catalano PM: The relationship between abnormal glucose tolerance and hypertensive disorders of pregnancy in healthy nulliparous women. Calcium for Preeclampsia Prevention (CPEP) Study Group. *Am J Obstet Gynecol* 179:1032–1037, 1998
- Stamilio D, Olsen T, Ratcliffe S, Sehdev H, Macones G: False-positive 1-hour glucose challenge test and adverse perinatal outcomes. *Obstet Gynecol* 103:148–156, 2004
- Hedderson M, Ferrara A, Sacks D: Gestational diabetes mellitus and lesser degrees of pregnancy hyperglycemia: association with increased risk of spontaneous preterm birth. *Obstet Gynecol* 102:850–856, 2003
- McLaughlin G, Cheng Y, Caughey A: Women with one elevated 3-hour glucose tolerance test value: are they at risk for adverse perinatal outcomes? *Am J Obstet Gynecol* 194:e16–e19, 2006
- Jensen CC, Cnop M, Hull RL, Fujimoto WY, Kahn SE:  $\beta$ -Cell function is a major contributor to oral glucose tolerance in high-risk relatives of four ethnic groups in the U.S. *Diabetes* 51:2170–2178, 2002
- Di Cianni G, Seghieri G, Lencioni C, Cucuru I, Anichini R, De Bellis A, Ghio A, Tesi F, Volpe L, Del Prato S: Normal glucose tolerance and gestational diabetes mellitus: what is in between? *Diabetes Care* 30:1783–1788, 2007
- Ergin T, Lembet A, Duran H, Kuscü E,

- Bagis T, Saygili E, Batioglu S: Does insulin secretion in patients with one abnormal glucose tolerance test value mimic gestational diabetes mellitus. *Am J Obstet Gynecol* 186:204–209, 2002
14. Knowler WC, Barrett-Connor E, Fowler SE, Hamman RF, Lachin JM, Walker EA, Nathan DM, the Diabetes Prevention Program Research Group: Reduction in the incidence of type 2 diabetes with lifestyle intervention or metformin. *N Engl J Med* 346:393–403, 2002
15. Tuomilehto J, Lindstrom J, Eriksson JG, Valle TT, Hamalainen H, Ilanne-Parikka P, Keinanen-Kiukkaaneimi S, Laakso M, Louheranta A, Rastas M, Salminen V, Uusitupa M: Prevention of type 2 diabetes mellitus by changes in lifestyle among subjects with impaired glucose tolerance. *N Engl J Med* 344:1343–1350, 2001
